# Supplementary material for: STAT4 and T-bet control follicular helper T cell development in viral infections
Source: PubMed Central journal article supplement — J Exp Med. 2018 Jan 2;215(1):337–55. doi: 10.1084/jem.20170457 (PMC5748849; doi:10.1084/jem.20170457), 2018-01-02
Supplement: JEM_20170457_sm.pdf [file JEM_20170457_sm.pdf]

SUPPLEMENTAL MATERIAL

Weinstein et al., <https://doi.org/10.1084/jem.20170457>

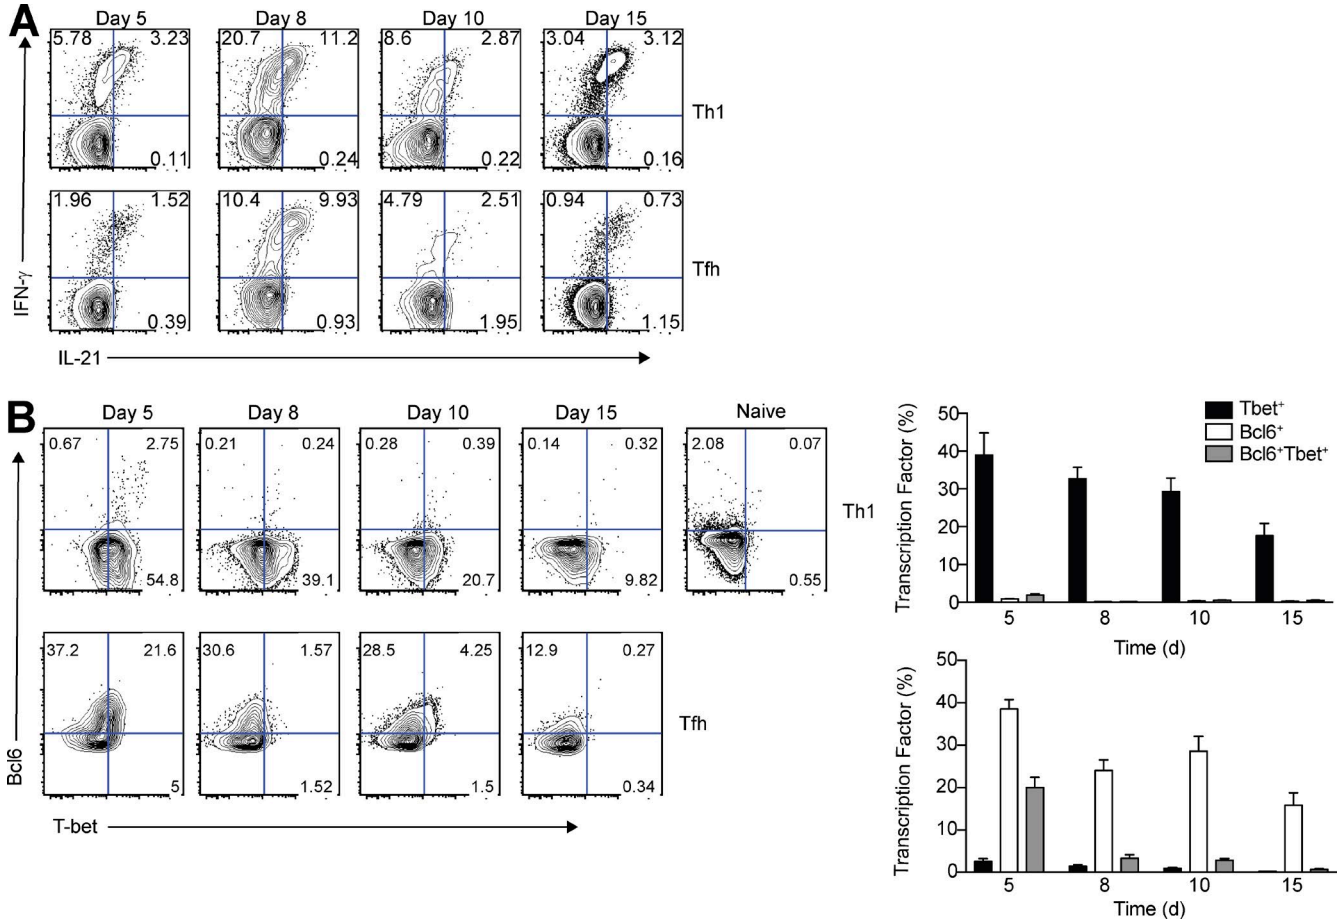

Figure S1. **Tfh cells express T-bet and coproduce IFN- $\gamma$  and IL-21.** Thy1.2<sup>+</sup> B6 mice were infected with LCMV Armstrong. Splenic Thy1.2<sup>+</sup> PSGL-1<sup>hi</sup>Ly6<sup>hi</sup>CXCR5<sup>lo</sup> Th1 and Thy1.2<sup>+</sup>PSGL-1<sup>lo</sup>Ly6<sup>lo</sup>CXCR5<sup>hi</sup>PD-1<sup>hi</sup> Tfh cells in recipient spleens were analyzed at days 5, 8, 10, and 15 p.i. **(A)** Representative flow cytometry plots of intracellular IL-21 and IFN- $\gamma$  staining in Th1 and Tfh cells. **(B)** Representative flow cytometry plots of intracellular staining for Bcl6 and T-bet in Th1 and Tfh cells with cell percentages of each transcription factor<sup>+</sup> population. Experiments were performed three times with  $n \geq 5$  mice per group. Error bars represent SEM.

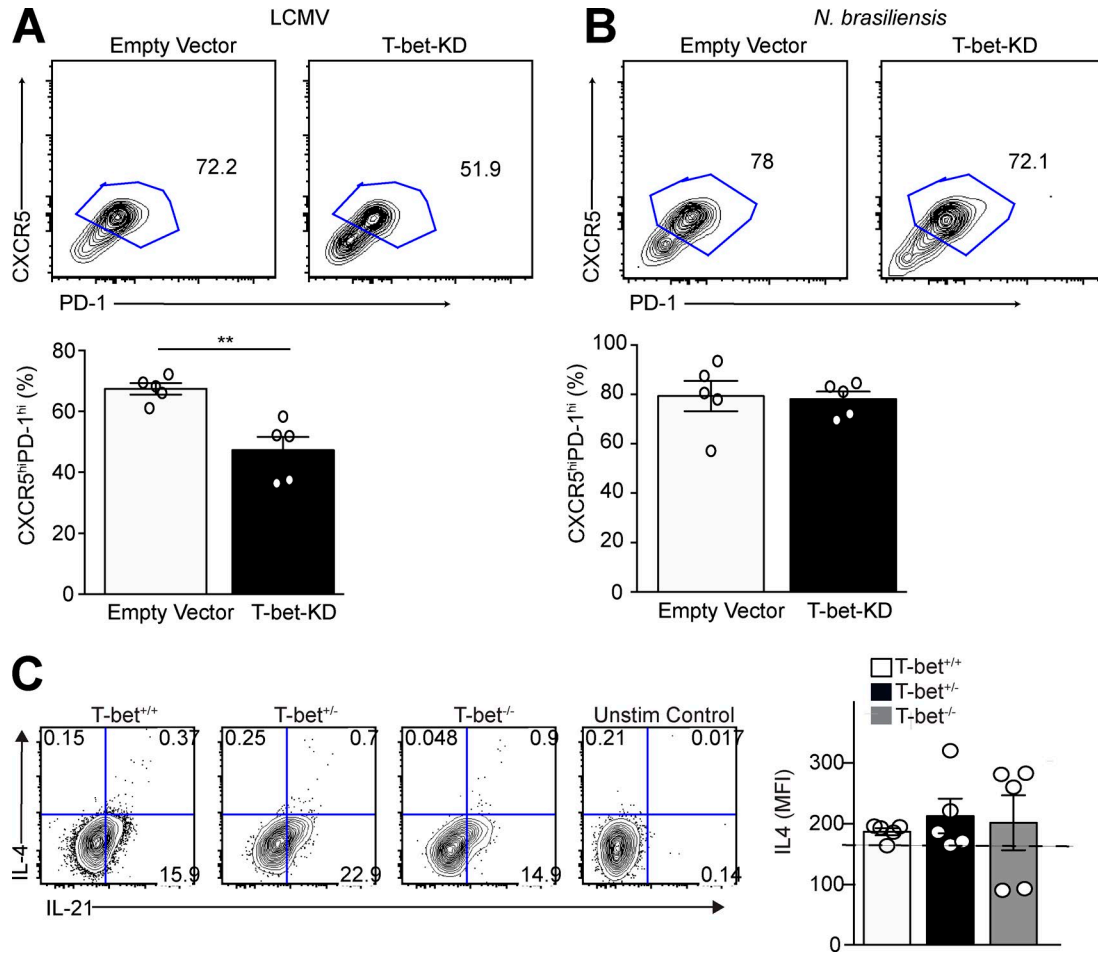

Figure S2. **T-bet is not required for Tfh cell differentiation in type 2 infection.** Thy1.1<sup>+</sup> Stg CD4<sup>+</sup> T cells or Thy1.1<sup>+</sup> OT-II (OVA-specific TCR) CD4<sup>+</sup> T cells were transduced with either a GFP-labeled retroviral T-bet knockdown or empty vector and transferred into Thy1.2<sup>+</sup> B6 mice followed by LCMV Armstrong or *N. brasiliensis* infection with OVA immunization (to activate TCR transgenic T cells), respectively. Transduced CD4<sup>+</sup>Thy1.1<sup>+</sup>GFP<sup>+</sup> PSGL-1<sup>lo</sup>Ly6<sup>lo</sup>CXCR5<sup>hi</sup>PD-1<sup>hi</sup> Tfh cells in recipient spleens were analyzed at 8 d p.i. **(A)** Representative flow cytometry plots of retrovirally transduced splenic Tfh cells after LCMV challenge with a bar graph that summarizes percentages of Tfh cells. **(B)** Representative flow cytometry plots of retrovirally transduced Tfh cells upon *N. brasiliensis* and OVA challenge with a bar graph that summarizes percentages of Tfh cells. **(C)** T-bet<sup>+/+</sup>, T-bet<sup>+/-</sup>, or T-bet<sup>-/-</sup> Thy1.1<sup>+</sup> Stg CD4<sup>+</sup> T cells were transferred to Thy1.2<sup>+</sup> B6 mice with LCMV Armstrong infection 24 h later. Spleens were harvested 8 d p.i. Representative flow cytometry plots of intracellular IL-21 and IL-4 staining in Tfh cells with a bar graph that summarizes MFI; dashed line represents mean MFI of unstimulated Tfh cells. Data are representative of two or three experiments with three to five recipients per group. \*\*, P < 0.01 by Student's *t* test. Error bars represent SEM.

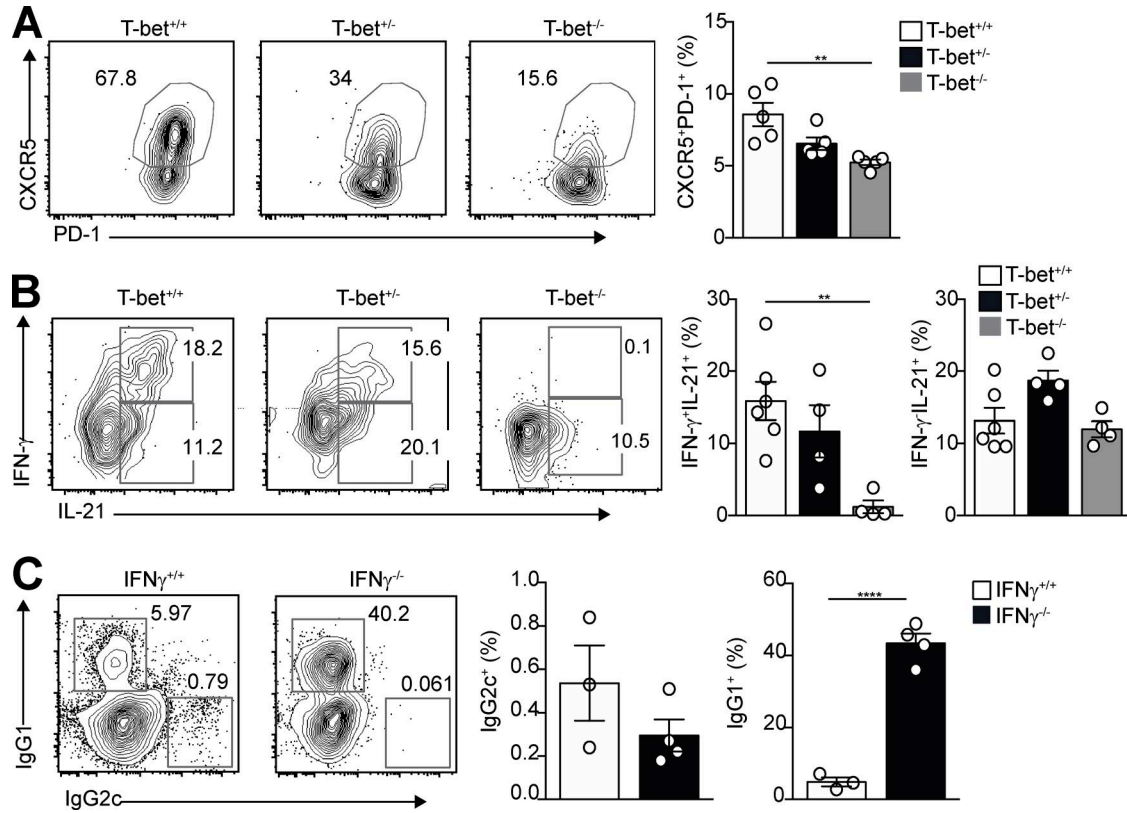

Figure S3. **T-bet expression in Tfh cells is necessary for proper GC development.** TCR- $\beta^{-/-}$  mice were infected with LCMV Armstrong a day after receiving in transfer Tbet<sup>+/+</sup>, Tbet<sup>+/-</sup>, or Tbet<sup>-/-</sup> Stg CD4<sup>+</sup> cells. Splenic Thy1.1<sup>+</sup>PSGL-1<sup>lo</sup>Ly6<sup>lo</sup>CXCR5<sup>hi</sup>PD-1<sup>hi</sup> Tfh cells in recipient spleens were analyzed at day 12 p.i. **(A)** Representative flow cytometry plots of CXCR5 and PD-1 staining of Tfh cells, with cell percentages and cell numbers. **(B)** Representative flow cytometry plots of intracellular IL-21 and IFN- $\gamma$  staining in donor Tfh cells with summed percentages. **(C)** IFN- $\gamma$ <sup>+/+</sup> and IFN- $\gamma$ <sup>-/-</sup> mice were infected with LCMV Armstrong and sacrificed 12 d p.i. Representative flow cytometry plots of intracellular IgG1 and IgG2c staining of CD4<sup>-</sup>B220<sup>+</sup>IgD<sup>lo</sup>CD95<sup>hi</sup>GL-7<sup>hi</sup> GC B cells with percentages of isotype<sup>+</sup> cells. Data are representative of three experiments with three to five recipients per group. \*\*, P < 0.01; \*\*\*\*, P < 0.0001 by Student's *t* test. Error bars represent SEM.

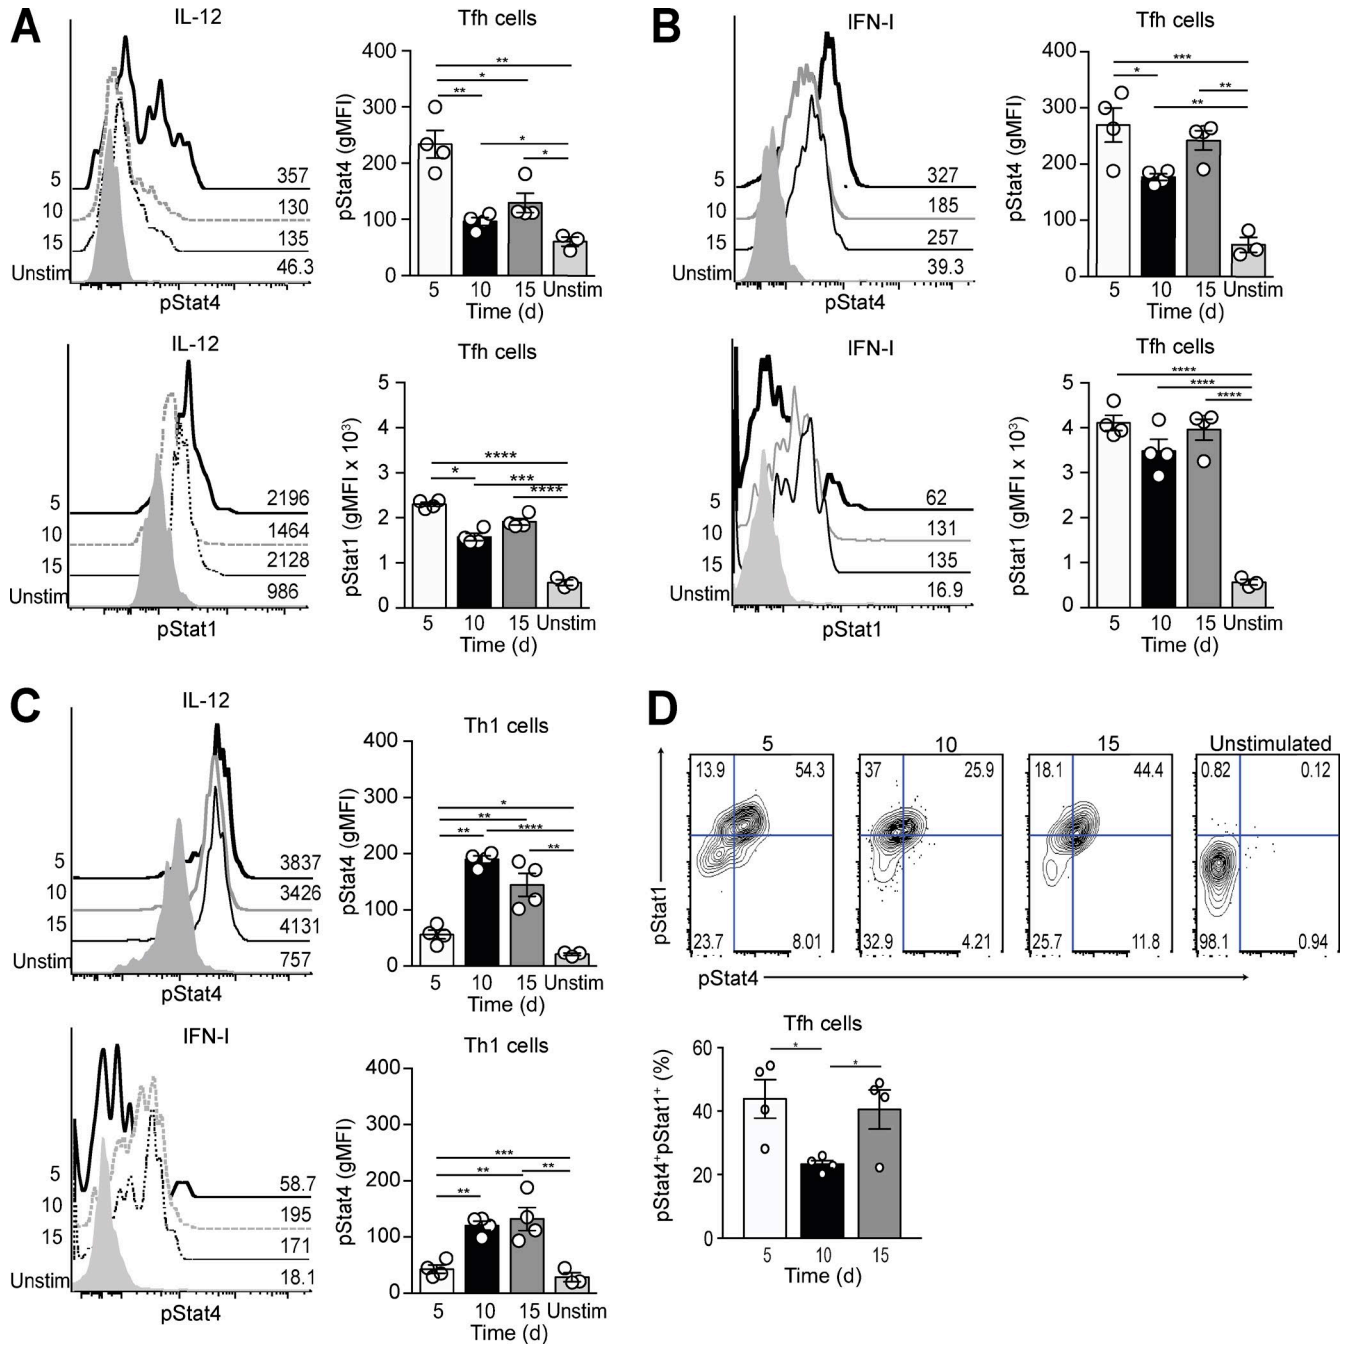

Figure S4. **Expression of pSTAT4 in Tfh cells.** Thy1.1<sup>+</sup> Stg TCR transgenic CD4<sup>+</sup> T cells were transferred into Thy1.2<sup>+</sup> B6 mice followed by infection with LCMV Armstrong 24 h later. Spleens were harvested at days 5, 10, and 15 p.i. **(A and B)** Total splenocytes were stimulated with either IL-12p40 (A) or IFN-β (B). Thy1.1<sup>+</sup>PSGL-1<sup>lo</sup>Ly6<sup>lo</sup>CXCR5<sup>hi</sup>PD-1<sup>hi</sup> Tfh cells staining was followed by intracellular staining for pSTAT4 or pSTAT1, as quantified by gMFI. **(C)** Expression of pSTAT4 in PSGL-1<sup>hi</sup>Ly6<sup>ch</sup> Th1 cells with quantified gMFI. **(D)** Representative flow cytometry plots of intracellular pSTAT1 and pSTAT4 staining of Tfh cells stimulated with IFN-β, with percentages of double-positive cells. Data are representative of three experiments with five recipients per group. \*, P < 0.05; \*\*, P < 0.01; \*\*\*, P < 0.001; \*\*\*\*, P < 0.0001 by Student's *t* test. Error bars represent SEM.

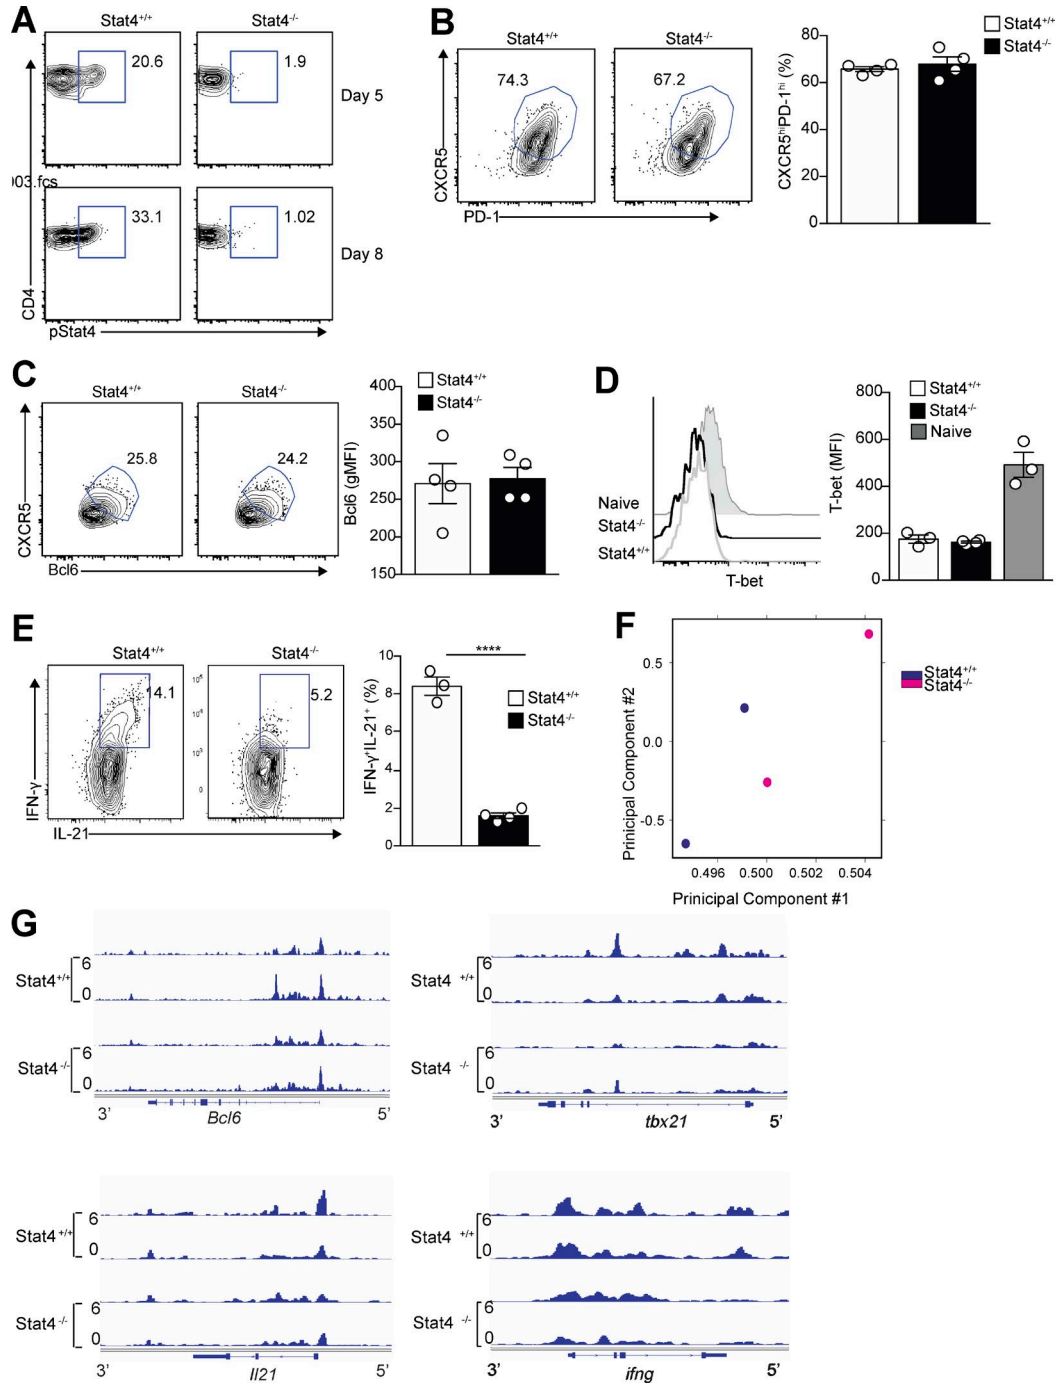

Figure S5. **STAT4 is required for cytokine production by Tfh cells but not their development.** Thy1.2 B6 mice were infected with LCMV a day after receiving naive Thy1.1<sup>+</sup>STAT4<sup>+/+</sup> or Thy1.1<sup>+</sup>STAT4<sup>-/-</sup> Stg CD4<sup>+</sup> T cells. **(A)** Total splenocytes from day 5 or day 8 p.i. were stimulated with IL-12p40, followed by intracellular staining for pSTAT4 in Thy1.1<sup>+</sup>CD4<sup>+</sup> T cells, as quantified by gMFI. **(B)** Representative flow cytometry plots of day 8 p.i. splenic Thy1.1<sup>+</sup>PSGL-1<sup>lo</sup>Ly6c<sup>lo</sup>CXCR5<sup>hi</sup>PD-1<sup>hi</sup> Tfh cells with percentages summarized. **(C)** Staining for intracellular Bcl6 and for surface CXCR5 in CD4<sup>+</sup>Thy1.1<sup>+</sup>Ly6c<sup>lo</sup>PSGL-1<sup>lo</sup> STAT4<sup>+/+</sup> and STAT4<sup>-/-</sup> Tfh cells in recipients, with gMFI of Bcl6 staining. **(D)** Intracellular T-bet staining in STAT4<sup>+/+</sup> and STAT4<sup>-/-</sup> Tfh and in Th1 and naive CD4<sup>+</sup>T cells with gMFI. **(E)** Representative flow cytometry plots of intracellular IL-21 and IFN- $\gamma$  staining of STAT4<sup>+/+</sup> and STAT4<sup>-/-</sup> Tfh cells from recipient spleens, with cell percentages summarized. ATAC-seq performed on two replicates each of WT and STAT4-deficient cells to assess chromatin accessibility. **(F)** Principal component analysis performed on called ATAC peaks revealed that control and STAT4 knockout samples were not distinctly separated by group. **(G)** ATAC-seq at the *Bcl6*, *Tbx21*, *Ifng*, and *Il21* loci and flanking regions revealed no statistically significant differences in chromatin accessibility between control and STAT4-deficient cells. Sorted Tfh cells were pooled from five STAT4<sup>+/+</sup> or STAT4<sup>-/-</sup> Stg mice. Two independent sorts were analyzed for ATAC-seq. Data are representative of three experiments with five recipients per group. \*\*\*\*, P < 0.0001 by Student's *t* test. Error bars represent SEM.

Table S1. **Antibodies used for flow cytometry, ELISA, and microscopy**

| Ag                | Dilution | Clone             | Fluorochrome           | Source                                         |
|-------------------|----------|-------------------|------------------------|------------------------------------------------|
| CD4               | 1:200    | RM4-5             | Alexa Fluor 700, BV510 | eBiosciences                                   |
| CD44              | 1:200    | IM7               | e450                   | eBiosciences                                   |
| PD-1              | 1:200    | J43               | PE-Cy7                 | eBiosciences                                   |
| IgD               | 1:200    | 26-Nov            | e450                   | eBiosciences                                   |
| CD40L             | 1:50     | MR1               | APC                    | eBiosciences                                   |
| B220              | 1:500    | RA3-6B2           | PE-Texas red           | BD Biosciences                                 |
| Thy1.1 (CD90.1)   | 1:200    | OX-7              | BV510                  | BD Biosciences                                 |
| CXCR5             |          | 2G8               | BV605                  | BD Biosciences                                 |
| CD62L             | 1:200    | MEL-14            | APC                    | BD Biosciences                                 |
| GL-7              | 1:200    | GL-7              | FITC                   | BD Biosciences                                 |
| CD95              | 1:200    | Jo2               | PE-Cy7                 | BD Biosciences                                 |
| IL-21R-FC chimera | 1:40     | Cat no. 596-MR    |                        | R&D Systems                                    |
| Ly6C              | 1:200    | AL-21             | FITC                   | BD Biosciences                                 |
| IgG2a             | 1:200    | R19-15            | PE                     | BD Biosciences                                 |
| IFN- $\gamma$     | 1:500    | XMG1.2            | PeCy7                  | BD Biosciences                                 |
| PSGL-1            | 1:1,000  | 2PH1              | APC                    | Conjugated in house to BD Biosciences antibody |
| pSTAT4            | 1:10     | SLEB11            | APC                    | BD Biosciences                                 |
| pSTAT1            | 1:10     | 4a                | PE                     | BD Biosciences                                 |
| Tbet              | 1:50     | eBio4B10          | APC                    | eBiosciences                                   |
| Bcl6              | 1:50     | K112-91           | PE                     | BD Biosciences                                 |
| IgG1              | 1:200    | A85-1             | FITC                   | BD Biosciences                                 |
| CD138             | 1:400    | 281-2             | APC                    | BD Biosciences                                 |
| IgG1              | 1:1,000  | Goat polyclonal   | HRP, AP                | Southern Biotech                               |
| CD4               | 1:200    | RM4-5             | FITC                   | eBiosciences                                   |
| IgD               | 1:200    | 26-Nov            | Alexa Fluor 647        | eBiosciences                                   |
| PNA               | 1:200    |                   | Biotin                 | Vector Labs                                    |
| FITC              | 1:200    | Rabbit polyclonal | Alexa Fluor 488        | Invitrogen                                     |
| Streptavidin      | 1:200    |                   | Alexa Fluor 555        | Invitrogen                                     |
| Anti-IgM AP       | 1:2,000  | Goat polyclonal   |                        | Southern Biotech                               |
| Anti-IgG1 AP      | 1:2,000  | Goat polyclonal   |                        | Southern Biotech                               |
| Anti-IgG2c AP     | 1:2,000  | Goat polyclonal   |                        | Southern Biotech                               |

Table S2. **Quantitative RT-PCR primers**

| Gene name    | Forward                          | Reverse                       |
|--------------|----------------------------------|-------------------------------|
| <i>Bcl6</i>  | 5' -CACACTCGAATCACTCTG-3'        | 5' -TATTGCACCTTGGTGTGG-3'     |
| <i>Tbx21</i> | 5' -CAACAACCCCTTTGCCAAAG-3'      | 5' -TCCCCCAAGCAGTTGACAGT-3'   |
| <i>Ifng</i>  | 5' -GATGCATTCATGAGTATTGCCAAGT-3' | 5' -GTGGACCACTCGGATGAGCTC-3'  |
| <i>Il21</i>  | 5' -TGAAAGCCTGTGGAAGTGCAAACC-3'  | 5' -AGCAGATTTCACAGGACACCCA-3' |
| <i>Batf</i>  | 5' -CACAGAAAGCCGACACCCTT-3'      | 5' -CACAGAAAGCCGACACCCTT-3'   |
| <i>Hprt</i>  | 5' -ACCTCTCGAAGTGTGGATACAG-3'    | 5' -CCTCGTATTTCAGATTCAACTT-3' |

Table S3 is a separate Excel document showing that the regulation of differential gene expression in STAT4<sup>+/+</sup> and STAT4<sup>-/-</sup> Tfh cells is not mediated at the level of chromatin accessibility.
